# Supplementary material
Source: publisher figshare collection journal article supplement (https://karger.figshare.com/ndownloader/files/30715934)
Supplement: Supplementary file 1 [file 30715934]

**Table S1 - Risk-of-Bias Assessment Using the Methodological Index for Non-Randomized Studies**

| Methodological items | EOM et al [22] | Hu et al [12] | Kochi et al [21] | Zhang et al [9] |
| --- | --- | --- | --- | --- |
| A clearly stated aim | 2 | 2 | 2 | 2 |
| Inclusion of consecutive patients | 1 | 1 | 2 | 1 |
| Prospective data collection | 0 | 0 | 0 | 0 |
| Appropriate end points | 2 | 2 | 2 | 2 |
| Unbiased assessment of endpoints | 2 | 2 | 2 | 2 |
| Appropriate follow up | 2 | 2 | 2 | 2 |
| Loss of follow up <5% | 1 | 1 | 0 | 0 |
| Prospective calculation of study size | 0 | 0 | 0 | 0 |
| An adequate control group | 2 | 2 | 2 | 2 |
| Contemporary groups | 2 | 2 | 2 | 2 |
| Baseline equivalence of groups | 2 | 2 | 2 | 2 |
| Adequate statistical analysis | 2 | 2 | 2 | 2 |
| **Total score** | 18 | 18 | 18 | 17 |
